# Supplementary figures and images for: Dynamics of SEAIQR Model with Saturated Type Treatment: A Case Study of Spain COVID-19
Source: Preprints.org preprint supplement (doi:10.20944/preprints202005.0217.v1), 2020-05-12

Effect of

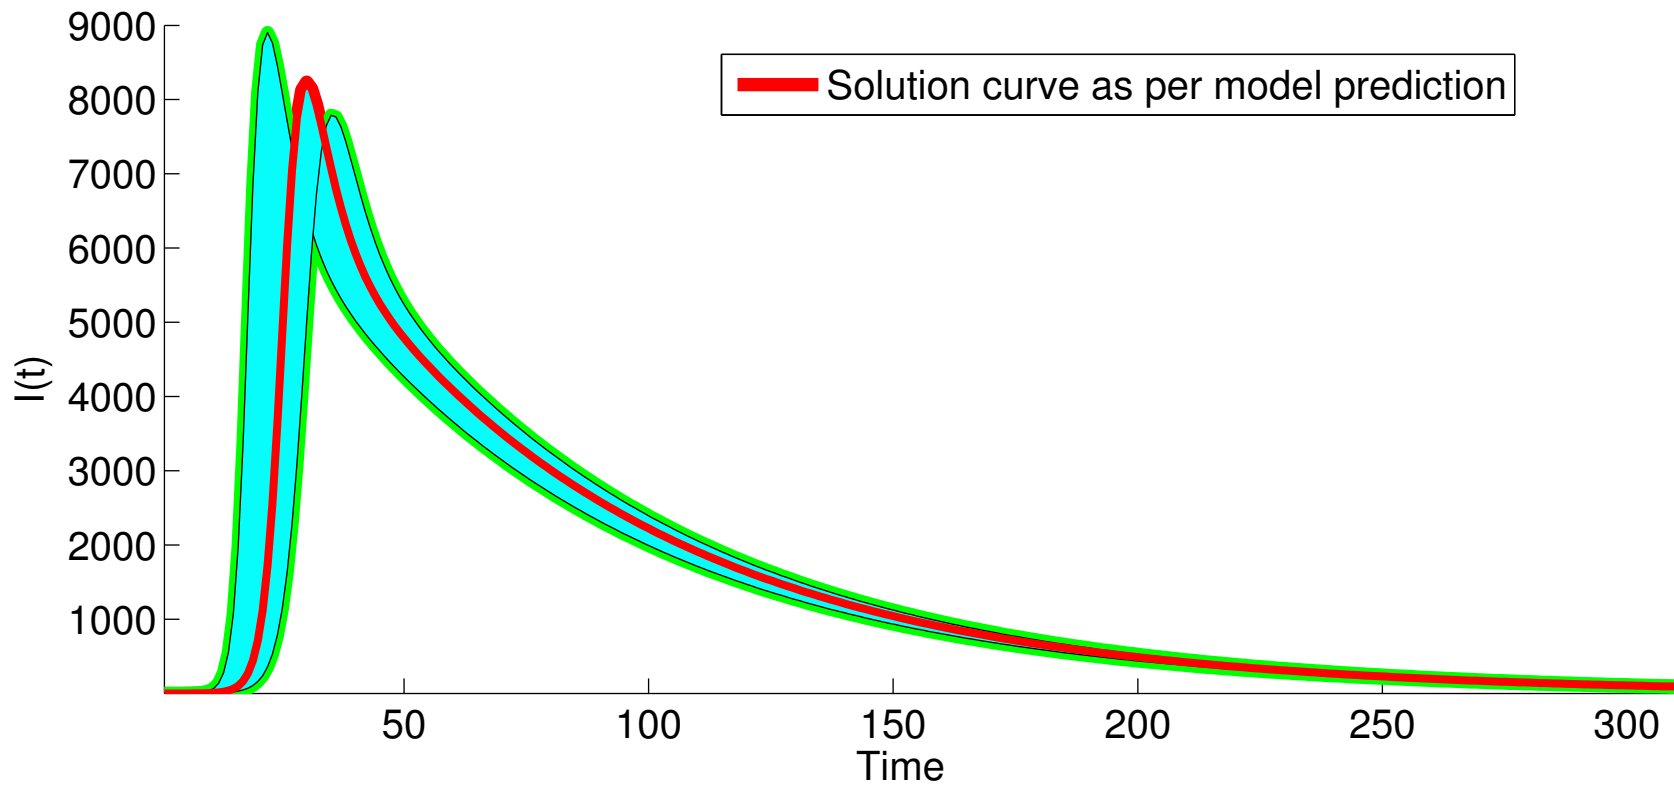

Supplement: Supplementary file 1 [file supplementary]

Effect of  $\beta_1$

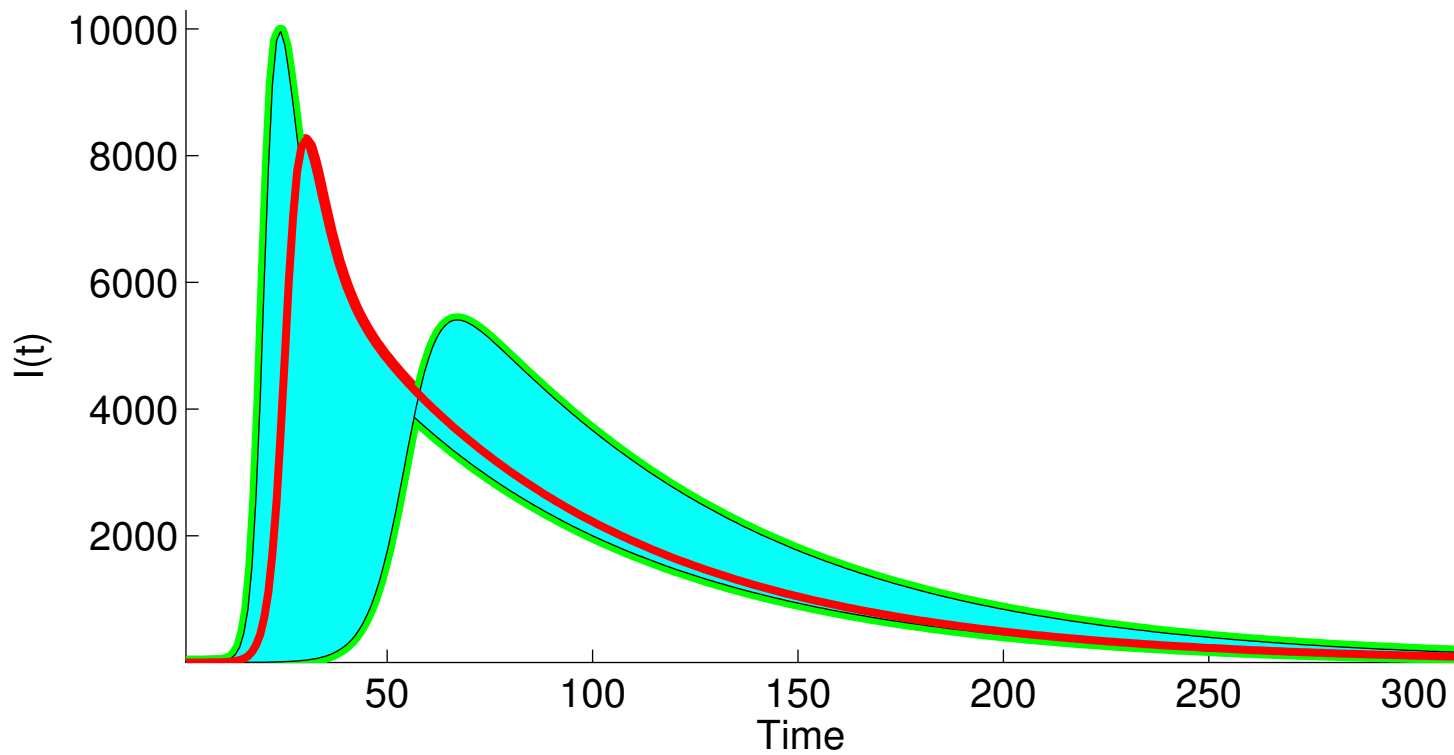

Supplement: Supplementary file 2 [file supplementary]

# Effect of $\gamma_4$

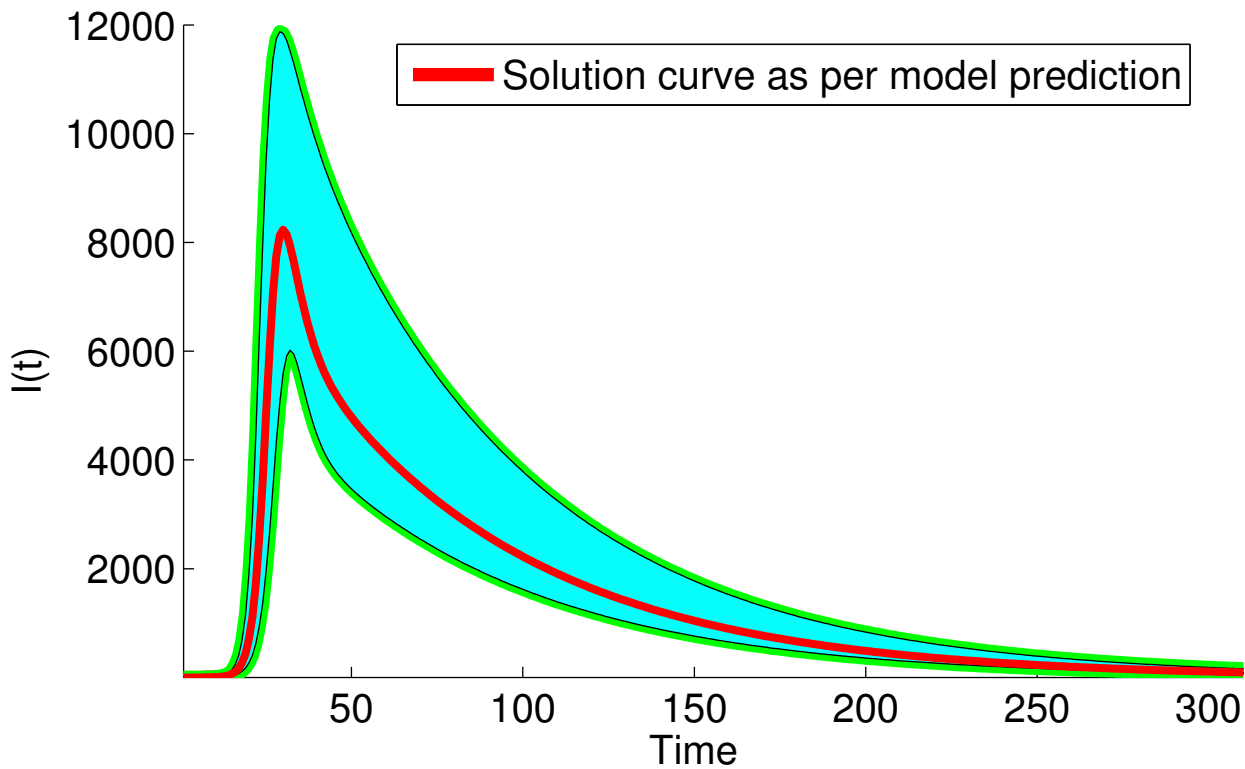

Supplement: Supplementary file 3 [file supplementary]

Effect of

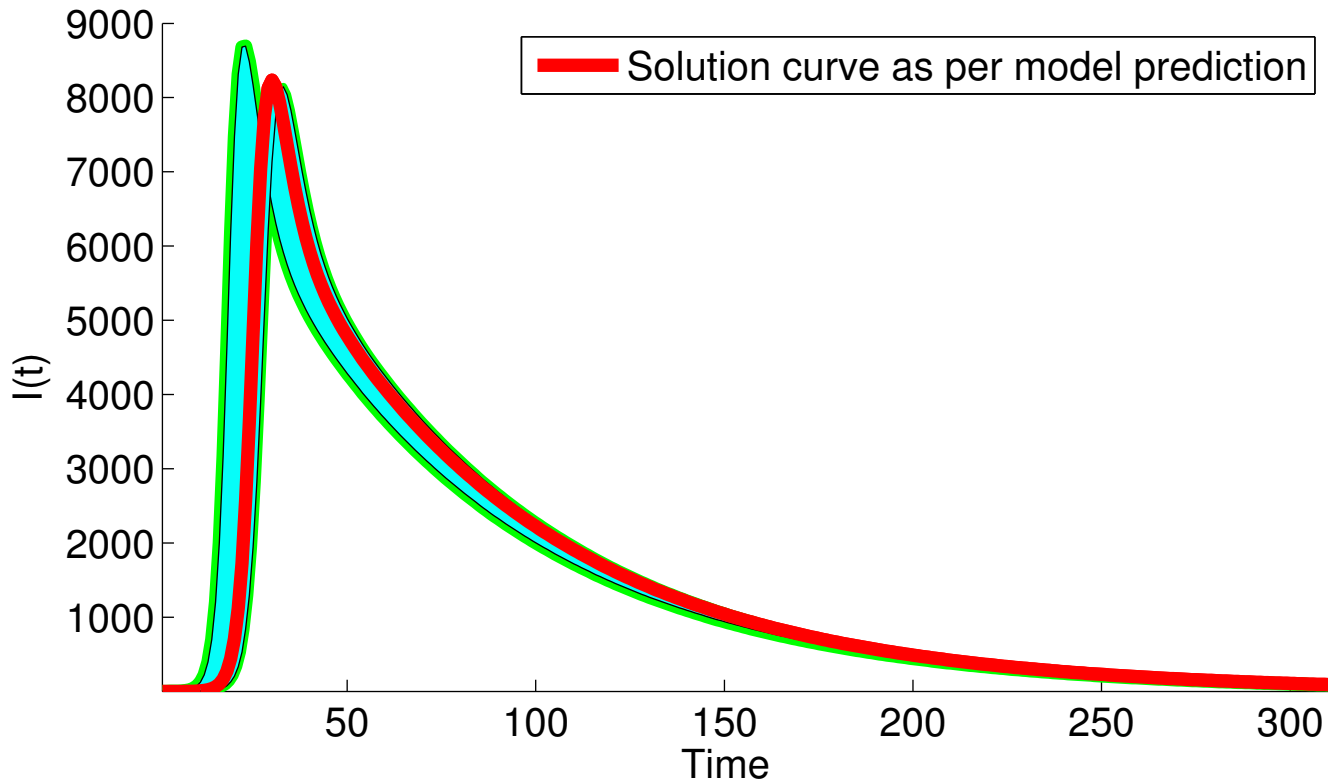

Supplement: Supplementary file 4 [file supplementary]

Effect of  $\gamma_1$

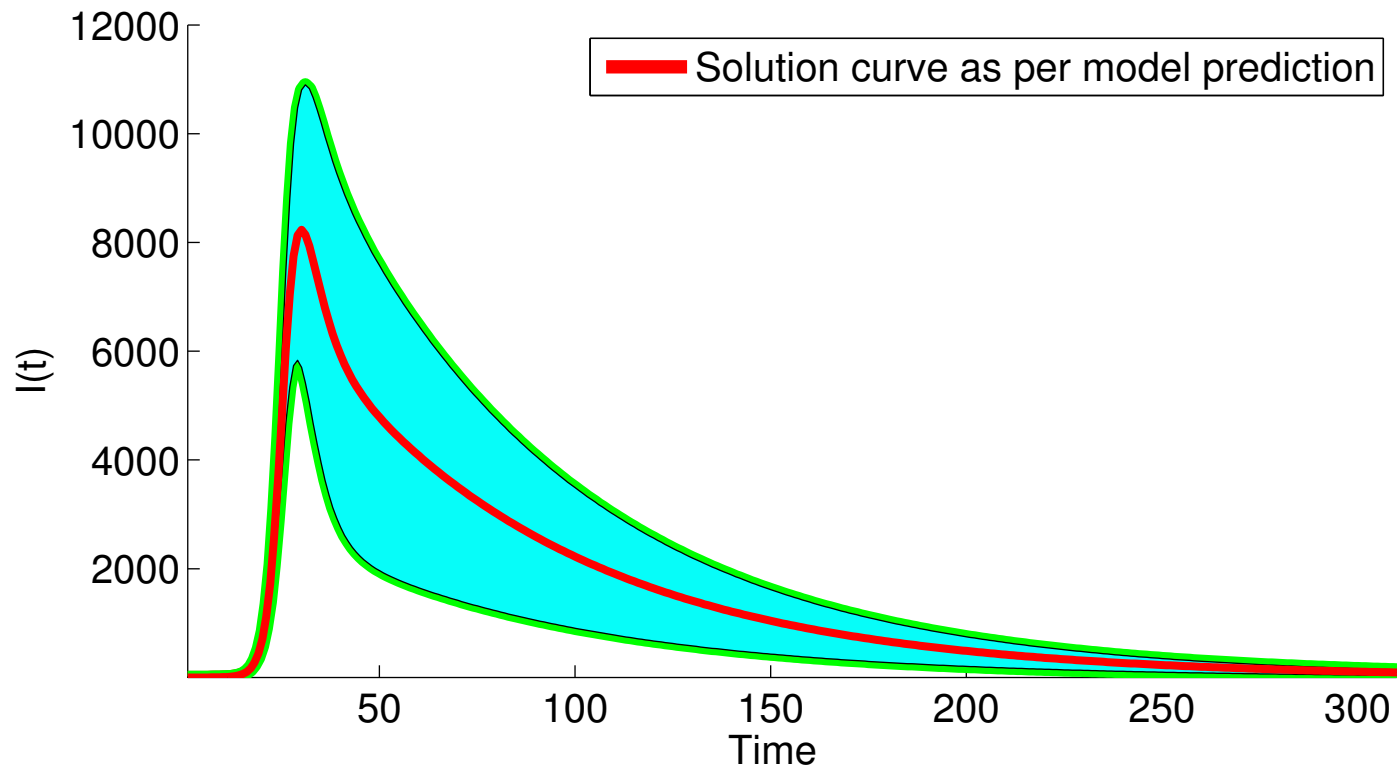

Supplement: Supplementary file 5 [file supplementary]

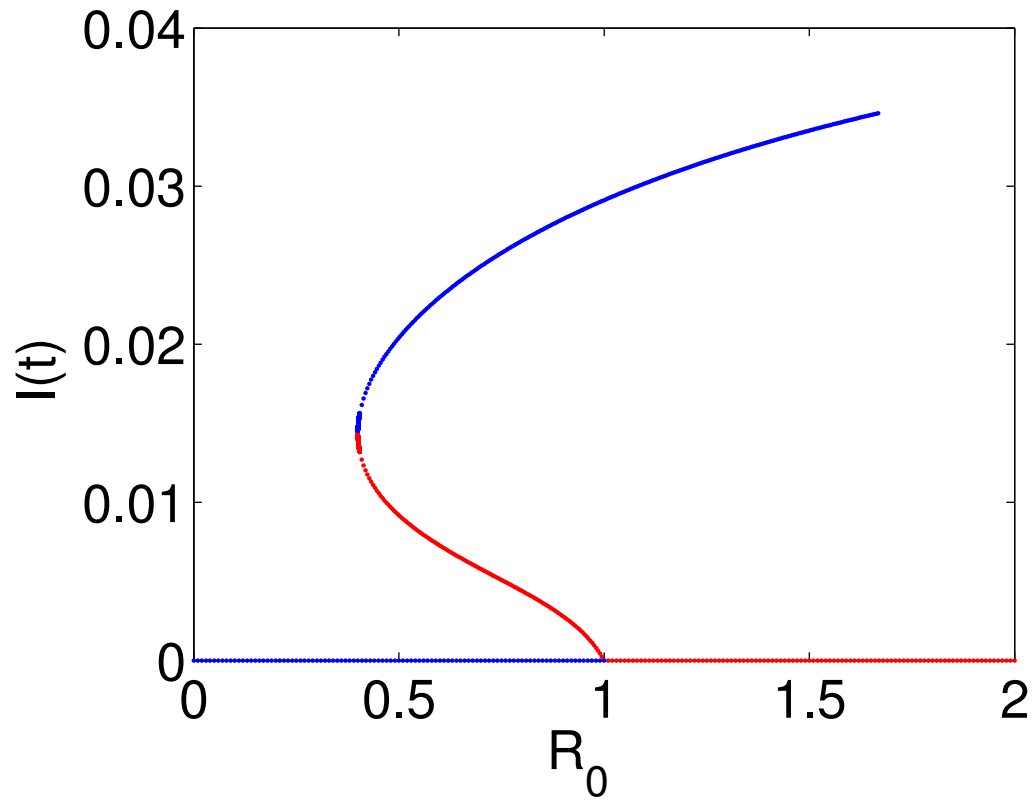

Supplement: Supplementary file 6 [file supplementary]
